# Supplementary material for: Trapping of HCl and oxidized, organic trace-gases in growing ice at temperatures relevant for cirrus clouds
Source: Copernicus journal article supplement (doi:10.5194/acp-2019-557), 2019-06-14
Supplement: Supplementary file 1 [file acp-2019-557-supplement.pdf]

# Trapping of HCl and oxidized, organic trace-gases in growing ice at temperatures relevant for the tropopause.

Matthias Kippenberger<sup>1</sup>, Gerhard Schuster<sup>1</sup>, Jos Lelieveld<sup>1</sup> and John N. Crowley<sup>1</sup>

<sup>1</sup>Max-Planck-Institut für Chemie, Division of Atmospheric Chemistry, Mainz, 55128 Germany.

5 Correspondence to: John Crowley: (John.crowley@mpic.de)

## Supplementary Information.

Tabulated datasets:

10 **Figure 3**

| [HCl]<br>(molecule cm <sup>-3</sup> ) | V <sub>IG</sub><br>(m s <sup>-1</sup> ) | σ (V <sub>IG</sub> )<br>(m s <sup>-1</sup> ) | γ        | σ (γ)    | J <sub>HCl</sub><br>(molecule s <sup>-1</sup> ) | σ (J <sub>HCl</sub> )<br>(molecule s <sup>-1</sup> ) |
|---------------------------------------|-----------------------------------------|----------------------------------------------|----------|----------|-------------------------------------------------|------------------------------------------------------|
| 2.3E10                                | 1.03E-08                                | 5.17E-10                                     | 1.35E-02 | 1.62E-03 | 4.13E+13                                        | 4.95E+12                                             |
| 2.3E10                                | 5.18E-09                                | 2.59E-10                                     | 7.05E-03 | 8.46E-04 | 2.32E+13                                        | 2.79E+12                                             |
| 2.3E10                                | 3.45E-09                                | 1.73E-10                                     | 3.90E-03 | 4.68E-04 | 1.33E+13                                        | 1.60E+12                                             |
| 2.3E10                                | 6.90E-09                                | 3.45E-10                                     | 9.18E-03 | 1.10E-03 | 2.95E+13                                        | 3.54E+12                                             |
| 2.3E10                                | 8.62E-09                                | 4.31E-10                                     | 1.17E-02 | 1.41E-03 | 3.67E+13                                        | 4.40E+12                                             |
| 2.3E10                                | 1.73E-09                                | 8.65E-11                                     | 1.69E-03 | 2.03E-04 | 5.92E+12                                        | 7.11E+11                                             |
| 2.3E10                                | 6.90E-09                                | 3.45E-10                                     | 9.23E-03 | 1.11E-03 | 3.21E+13                                        | 3.85E+12                                             |
| 2.3E10                                | 5.18E-09                                | 2.59E-10                                     | 8.49E-03 | 1.02E-03 | 2.98E+13                                        | 3.58E+12                                             |
| 2.3E10                                | 3.45E-09                                | 1.73E-10                                     | 4.99E-03 | 5.98E-04 | 1.82E+13                                        | 2.19E+12                                             |
| 2.3E10                                | 1.73E-09                                | 8.65E-11                                     | 2.27E-03 | 2.72E-04 | 8.55E+12                                        | 1.03E+12                                             |
| 2.3E10                                | 8.62E-09                                | 4.31E-10                                     | 1.05E-02 | 1.26E-03 | 3.59E+13                                        | 4.31E+12                                             |
| 2.3E10                                | 1.03E-08                                | 5.17E-10                                     | 1.29E-02 | 1.54E-03 | 4.30E+13                                        | 5.16E+12                                             |
|                                       |                                         |                                              |          |          |                                                 |                                                      |
| 7.1E10                                | 4.17E-09                                | 2.09E-10                                     | 1.20E-03 | 1.44E-04 | 1.30E+13                                        | 1.57E+12                                             |
| 7.1E10                                | 8.77E-09                                | 4.38E-10                                     | 3.39E-03 | 4.06E-04 | 3.60E+13                                        | 4.32E+12                                             |
| 7.1E10                                | 1.34E-08                                | 6.68E-10                                     | 6.10E-03 | 7.32E-04 | 6.28E+13                                        | 7.54E+12                                             |
| 7.1E10                                | 2.26E-08                                | 1.13E-09                                     | 9.46E-03 | 1.14E-03 | 9.37E+13                                        | 1.12E+13                                             |

**Figure 4**

| <b>T<br/>(K)</b> | <b><math>V_{IG}</math><br/>(<math>m s^{-1}</math>)</b> | <b><math>\sigma(V_{IG})</math><br/>(<math>m s^{-1}</math>)</b> | <b><math>\gamma</math></b> | <b><math>\sigma(\gamma)</math></b> | <b><math>J_{HCl}</math><br/>(<math>molecule s^{-1}</math>)</b> | <b><math>\sigma(J_{HCl})</math><br/>(<math>molecule s^{-1}</math>)</b> |
|------------------|--------------------------------------------------------|----------------------------------------------------------------|----------------------------|------------------------------------|----------------------------------------------------------------|------------------------------------------------------------------------|
| 195              | 3.89E-09                                               | 1.94E-10                                                       | 8.23E-03                   | 9.88E-04                           | 2.39E+13                                                       | 2.87E+12                                                               |
| 195              | 4.82E-09                                               | 2.41E-10                                                       | 1.08E-02                   | 1.30E-03                           | 3.05E+13                                                       | 3.65E+12                                                               |
| 195              | 5.75E-09                                               | 2.87E-10                                                       | 1.41E-02                   | 1.70E-03                           | 3.77E+13                                                       | 4.53E+12                                                               |
| 195              | 6.68E-09                                               | 3.34E-10                                                       | 1.57E-02                   | 1.89E-03                           | 4.17E+13                                                       | 5.00E+12                                                               |
| 195              | 4.54E-09                                               | 2.27E-10                                                       | 1.25E-02                   | 1.50E-03                           | 3.31E+13                                                       | 3.97E+12                                                               |
| 195              | 5.28E-09                                               | 2.64E-10                                                       | 1.38E-02                   | 1.66E-03                           | 3.64E+13                                                       | 4.37E+12                                                               |
| 195              | 6.40E-09                                               | 3.20E-10                                                       | 1.78E-02                   | 2.13E-03                           | 4.37E+13                                                       | 5.25E+12                                                               |
|                  |                                                        |                                                                |                            |                                    |                                                                |                                                                        |
| 211              | 1.03E-08                                               | 5.17E-10                                                       | 1.35E-02                   | 1.62E-03                           | 4.13E+13                                                       | 4.95E+12                                                               |
| 211              | 5.18E-09                                               | 2.59E-10                                                       | 7.05E-03                   | 8.46E-04                           | 2.32E+13                                                       | 2.79E+12                                                               |
| 211              | 3.45E-09                                               | 1.73E-10                                                       | 3.90E-03                   | 4.68E-04                           | 1.33E+13                                                       | 1.60E+12                                                               |
| 211              | 6.90E-09                                               | 3.45E-10                                                       | 9.18E-03                   | 1.10E-03                           | 2.95E+13                                                       | 3.54E+12                                                               |
| 211              | 8.62E-09                                               | 4.31E-10                                                       | 1.17E-02                   | 1.41E-03                           | 3.67E+13                                                       | 4.40E+12                                                               |
| 211              | 1.73E-09                                               | 8.65E-11                                                       | 1.69E-03                   | 2.03E-04                           | 5.92E+12                                                       | 7.11E+11                                                               |
| 211              | 6.90E-09                                               | 3.45E-10                                                       | 9.23E-03                   | 1.11E-03                           | 3.21E+13                                                       | 3.85E+12                                                               |
| 211              | 5.18E-09                                               | 2.59E-10                                                       | 8.49E-03                   | 1.02E-03                           | 2.98E+13                                                       | 3.58E+12                                                               |
| 211              | 3.45E-09                                               | 1.73E-10                                                       | 4.99E-03                   | 5.98E-04                           | 1.82E+13                                                       | 2.19E+12                                                               |
| 211              | 1.73E-09                                               | 8.65E-11                                                       | 2.27E-03                   | 2.72E-04                           | 8.55E+12                                                       | 1.03E+12                                                               |
| 211              | 8.62E-09                                               | 4.31E-10                                                       | 1.05E-02                   | 1.26E-03                           | 3.59E+13                                                       | 4.31E+12                                                               |
| 211              | 1.03E-08                                               | 5.17E-10                                                       | 1.29E-02                   | 1.54E-03                           | 4.30E+13                                                       | 5.16E+12                                                               |
|                  |                                                        |                                                                |                            |                                    |                                                                |                                                                        |
| 227              | 8.59E-09                                               | 4.29E-10                                                       | 3.31E-03                   | 3.97E-04                           | 1.77E+13                                                       | 2.12E+12                                                               |
| 227              | 1.76E-08                                               | 8.78E-10                                                       | 7.18E-03                   | 8.61E-04                           | 3.66E+13                                                       | 4.40E+12                                                               |
| 227              | 2.65E-08                                               | 1.33E-09                                                       | 1.07E-02                   | 1.29E-03                           | 5.28E+13                                                       | 6.34E+12                                                               |
| 227              | 4.10E-09                                               | 2.05E-10                                                       | 2.01E-03                   | 2.41E-04                           | 1.10E+13                                                       | 1.32E+12                                                               |
| 227              | 1.31E-08                                               | 6.54E-10                                                       | 4.86E-03                   | 5.83E-04                           | 2.54E+13                                                       | 3.04E+12                                                               |
| 227              | 1.31E-08                                               | 6.54E-10                                                       | 4.08E-03                   | 4.89E-04                           | 2.15E+13                                                       | 2.58E+12                                                               |
| 227              | 2.20E-08                                               | 1.10E-09                                                       | 8.26E-03                   | 9.92E-04                           | 4.09E+13                                                       | 4.91E+12                                                               |
| 227              | 3.10E-08                                               | 1.55E-09                                                       | 8.90E-03                   | 1.07E-03                           | 4.37E+13                                                       | 5.25E+12                                                               |

**Figure 5**

| <b>T<br/>(K)</b> | <b>(1-<math>\theta</math>)</b> | <b><math>\gamma / V_{IG}</math><br/>(<math>m^{-1} s</math>)</b> | <b><math>\sigma (\gamma / V_{IG})</math><br/>(<math>m^{-1} s</math>)</b> |
|------------------|--------------------------------|-----------------------------------------------------------------|--------------------------------------------------------------------------|
| 195              | 0.40984                        | 3.36E+06                                                        | 8.04E+05                                                                 |
| 195              | 0.32134                        | 2.89E+06                                                        | 5.31E+05                                                                 |
| 195              | 0.57182                        | 4.63E+06                                                        | 1.55E+06                                                                 |
| 195              | 0.39432                        | 3.44E+06                                                        | 3.05E+05                                                                 |
|                  |                                |                                                                 |                                                                          |
| 200              | 0.44484                        | 1.58E+06                                                        | 2.78E+05                                                                 |
| 200              | 0.36657                        | 1.54E+06                                                        | 9.81E+04                                                                 |
| 200              | 0.37994                        | 1.32E+06                                                        | 7.58E+04                                                                 |
| 200              | 0.39432                        | 1.83E+06                                                        | 9.75E+04                                                                 |
| 200              | 0.20661                        | 6.95E+05                                                        | 1.57E+05                                                                 |
|                  |                                |                                                                 |                                                                          |
| 210              | 0.31172                        | 1.12E+06                                                        | 8.54E+04                                                                 |
| 210              | 0.18464                        | 1.08E+06                                                        | 3.13E+04                                                                 |
| 210              | 0.16426                        | 7.16E+05                                                        | 5.94E+04                                                                 |
| 210              | 0.13631                        | 6.54E+05                                                        | 1.00E+00                                                                 |
| 210              | 0.15684                        | 4.74E+05                                                        | 7.84E+04                                                                 |
| 210              | 0.12794                        | 4.52E+05                                                        | 3.33E+04                                                                 |
| 210              | 0.27115                        | 1.02E+06                                                        | 1.00E+00                                                                 |
|                  |                                |                                                                 |                                                                          |
| 222              | 0.11521                        | 2.98E+05                                                        | 4.21E+04                                                                 |
| 222              | 0.36657                        | 7.29E+05                                                        | 9.13E+04                                                                 |
|                  |                                |                                                                 |                                                                          |
| 227              | 0.32134                        | 3.76E+05                                                        | 1.25E+05                                                                 |
| 227              | 0.1552                         | 2.21E+05                                                        | 1.43E+04                                                                 |
| 227              | 0.06453                        | 1.48E+05                                                        | 1.02E+04                                                                 |
| 227              | 0.23992                        | 2.89E+05                                                        | 3.47E+04                                                                 |

**Figure 6**

| <b>T<br/>(K)</b> | <b>1/T<br/>(K<sup>-1</sup>)</b> | <b><math>(\gamma / V_{IG})(1-\theta)^{-1}</math><br/>(m<sup>-1</sup> s)</b> | <b><math>\sigma \{(\gamma / V_{IG})(1-\theta)^{-1}\}</math><br/>(m<sup>-1</sup> s)</b> |
|------------------|---------------------------------|-----------------------------------------------------------------------------|----------------------------------------------------------------------------------------|
| 195              | 0.00513                         | 8.67E+06                                                                    | 2.68E+05                                                                               |
| 200              | 0.005                           | 3.96E+06                                                                    | 2.57E+05                                                                               |
| 210              | 0.00476                         | 3.98E+06                                                                    | 1.83E+05                                                                               |
| 222              | 0.0045                          | 2.18E+06                                                                    | 2.76E+05                                                                               |
| 227              | 0.00441                         | 1.53E+06                                                                    | 2.15E+05                                                                               |

5

**Figure 7**

| <b>T<br/>(K)</b> | <b>1/T<br/>(K<sup>-1</sup>)</b> | <b><math>n^*</math><br/>(molecule cm<sup>-3</sup>)</b> | <b><math>\sigma (n^*)</math><br/>(molecule cm<sup>-3</sup>)</b> |
|------------------|---------------------------------|--------------------------------------------------------|-----------------------------------------------------------------|
| 195              | 0.00513                         | 7.20E+18                                               | 1.70E+18                                                        |
| 200              | 0.005                           | 3.60E+18                                               | 2.00E+18                                                        |
| 210              | 0.00476                         | 2.70E+18                                               | 9.00E+17                                                        |
| 222              | 0.0045                          | 1.10E+18                                               | 6.00E+17                                                        |
| 227              | 0.00441                         | 1.80E+18                                               | 1.00E+18                                                        |
